# Supplementary material for: Integrin α3β1 Promotes Invasive and Metastatic Properties of Breast Cancer Cells through Induction of the Brn-2 Transcription Factor
Source: PubMed Central journal article supplement (PMC7866210; doi:10.3390/cancers13030480), 2021-01-27

# Supplemental materials: Integrin $\alpha3\beta1$ promotes invasive and metastatic properties of breast cancer cells through induction of the Brn-2 transcription factor.

Rakshitha Pandulal Miskin<sup>1</sup>, Janine S. A. Warren<sup>2</sup>, Abibatou Ndoeye<sup>3</sup>, Lei Wu<sup>3</sup>, John M. Lamar<sup>2</sup>, and C. Michael DiPersio<sup>2,3\*</sup>

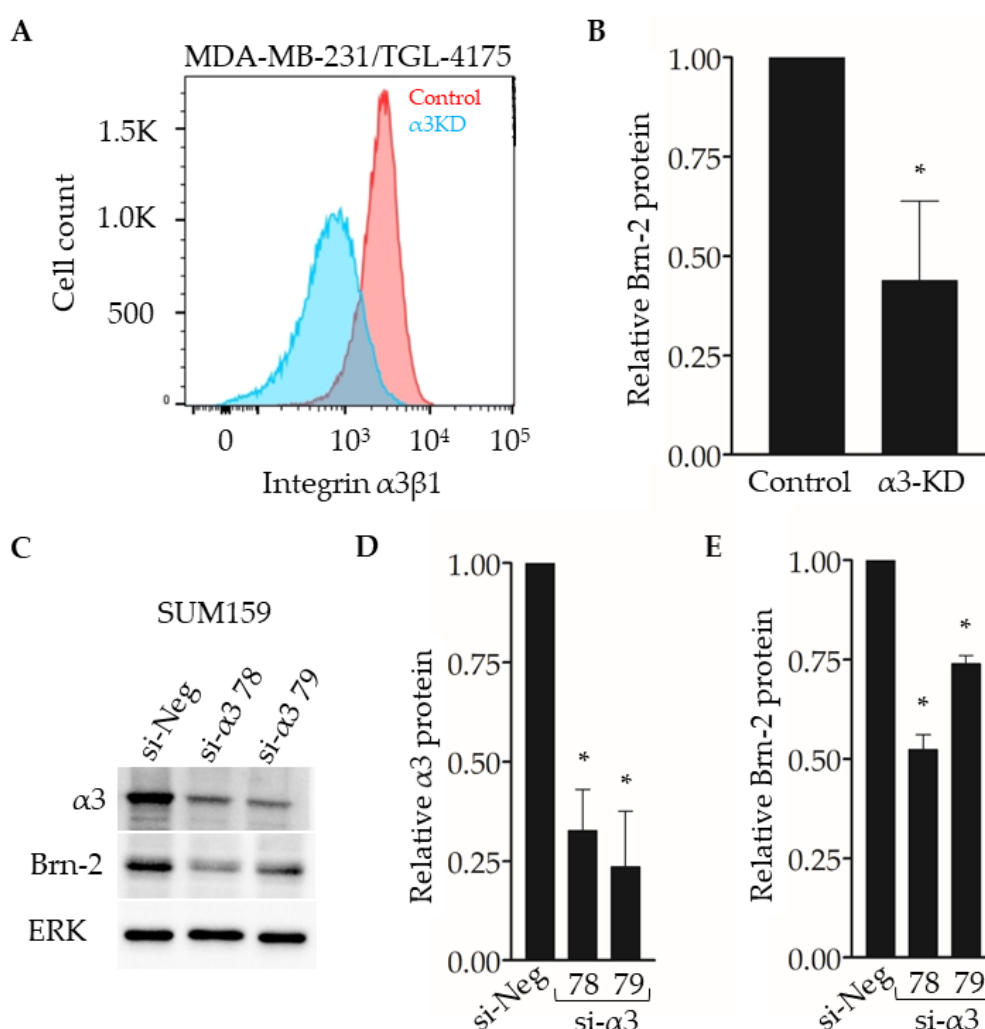

**Figure S1.** Suppression of integrin  $\alpha3\beta1$  decreases Brn-2 protein in the TGL-4175 variant of MDA-MB-231 line, and in SUM159 cells. (A) Flow cytometry using monoclonal antibody, P1B5, to compare cell surface levels of integrin  $\alpha3$  in TGL-4175 cells that stably express either non-targeting shRNA (Control) or  $\alpha3$ -targeting shRNA ( $\alpha3KD$ ). (B) Western blot quantification of relative Brn-2 protein in  $\alpha3KD$  TGL-4175 cells relative to control. (C) Representative western blots for integrin  $\alpha3$ ,

Brn-2 or ERK (loading control) in SUM159 cells transiently transfected with negative control siRNA (si-Neg) or with two distinct siRNAs that target integrin  $\alpha 3$  (si- $\alpha 3$  78, si- $\alpha 3$  79). Data are quantified in (D) and (E), respectively, relative to control; n=3; mean  $\pm$  SEM; \*p<0.05; two-tailed T-test (B) or two-tailed T-test with Bonferroni correction (D, E).

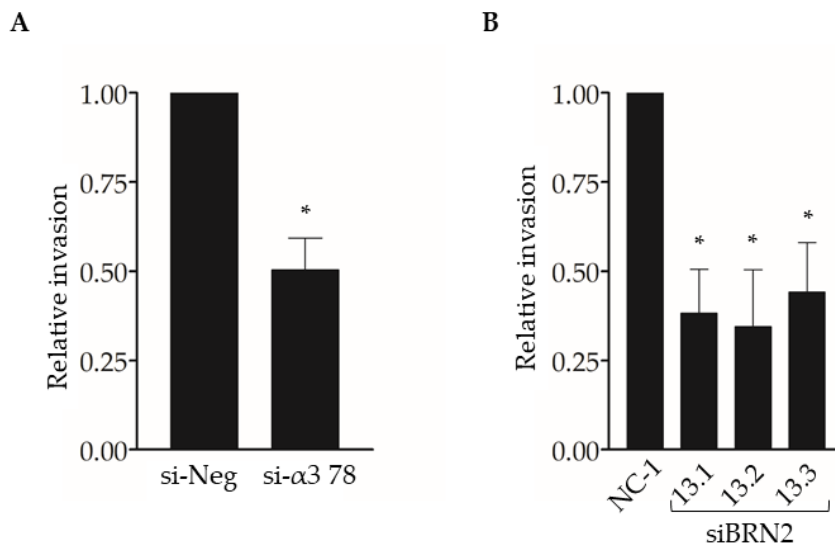

**Figure S2.** RNAi-targeting of integrin  $\alpha 3$  or *BRN2* reduces SUM159 cell invasion. Matrigel transwell invasion assays were performed using SUM159 cells transfected with (A) non-targeting siRNA (si-Neg) or integrin  $\alpha 3$ -targeting siRNA (si- $\alpha 3$  78) and (B) non-targeting dicer-substrate siRNA (NC-1) or *BRN2*-targeting dicer-substrate siRNA (si*BRN2* 13.1, 13.2, or 13.3). Graphs show invasion of  $\alpha 3$ -knockdown cells (A) or Brn-2 knockdown cells (B) relative to control cells; n=3; mean  $\pm$  SEM; \*p<0.05; two-tailed T-test (A) or two-tailed T-test with Bonferroni correction (B).

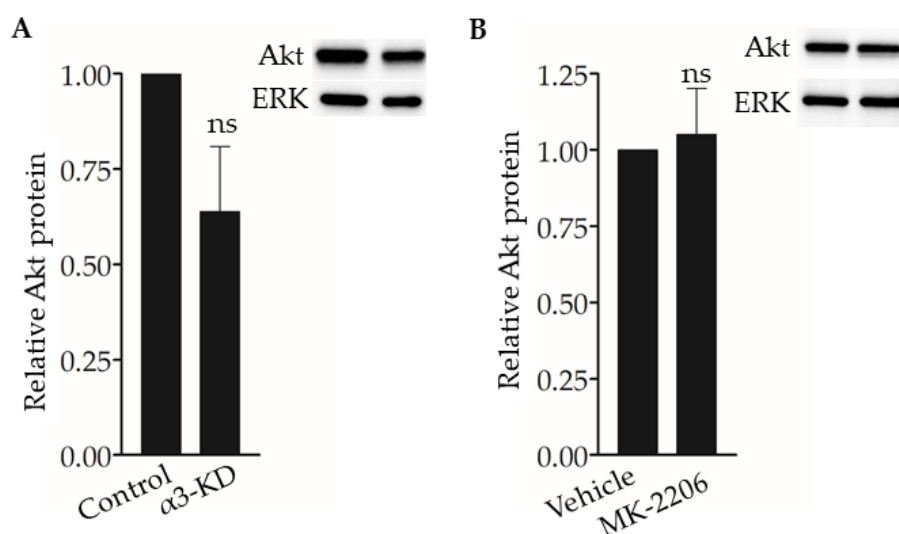

**Figure S3.** Suppression of integrin  $\alpha 3\beta 1$  or treatment with MK-2206 does not significantly alter total Akt protein levels in MDA-MB-231 cells. (A, B) Representative western blots and corresponding graphs show Akt levels in (A)  $\alpha 3$ KD cells relative to control cells, and (B) MDA-MB-231 cells treated with MK-2206 relative to vehicle-treated cells; n=3; mean  $\pm$  SEM; \*p<0.05; two-tailed T-test.

## Figure S4: Uncropped Western blotting figures

Integrin  $\alpha 3\beta 1$  promotes invasive and metastatic properties of breast cancer cells through induction of the Brn-2 transcription factor

Rakshitha Pandulal Miskin<sup>1</sup>, Janine S. A. Warren<sup>2</sup>, Abibatou Ndoeye<sup>3</sup>, Lei Wu<sup>3</sup>, John M. Lamar<sup>2</sup>, and C. Michael DiPersio<sup>2,3\*</sup>

Figure 3A

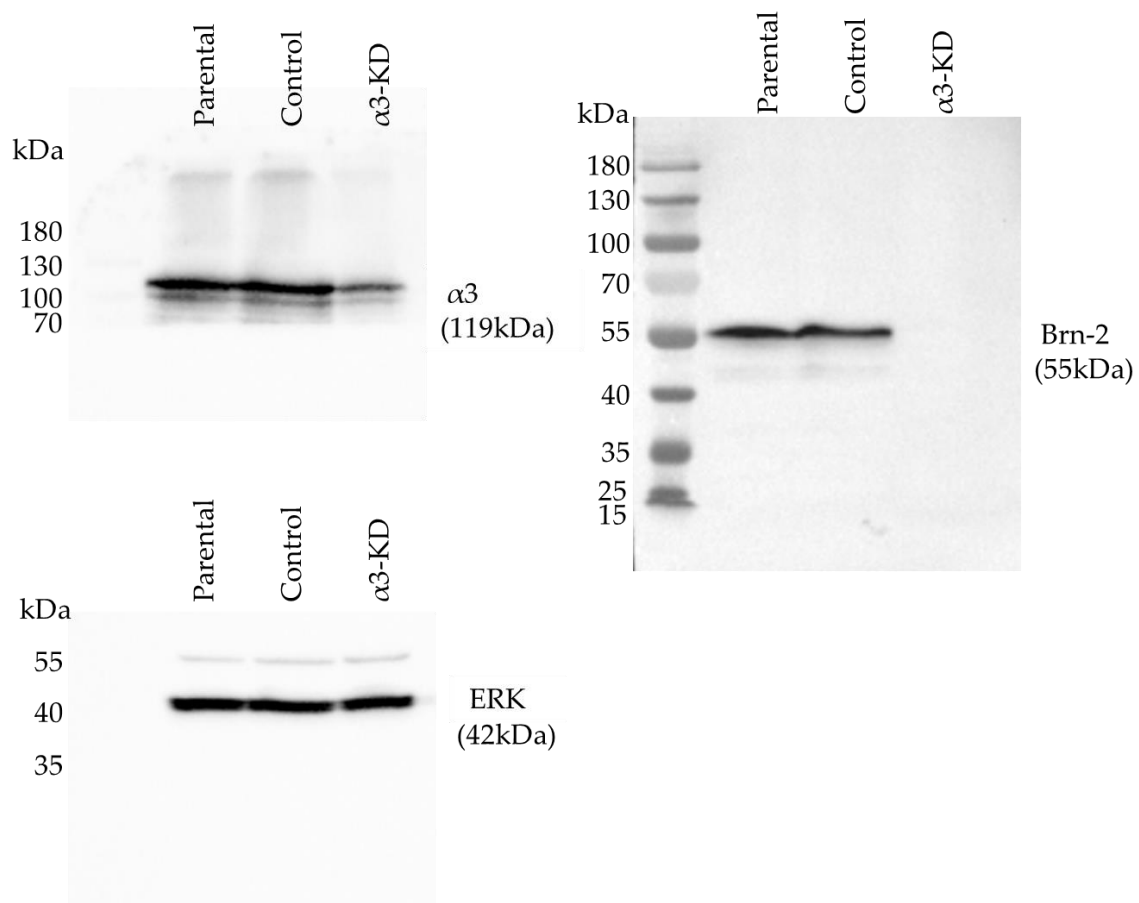

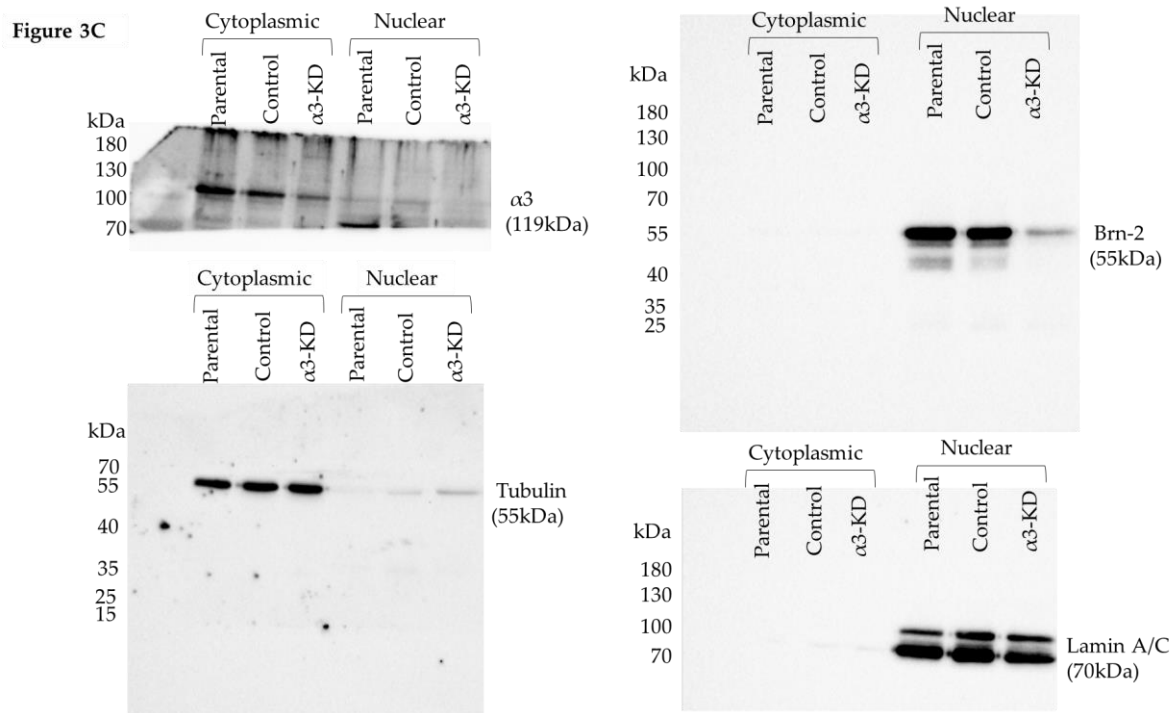

**Figure S1C**

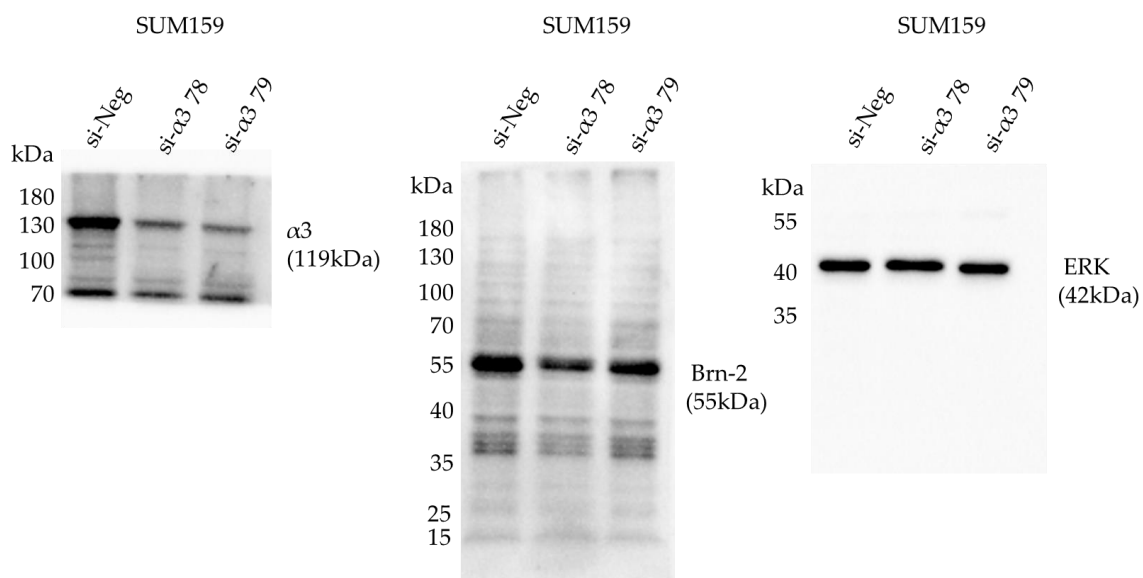

Figure 5A

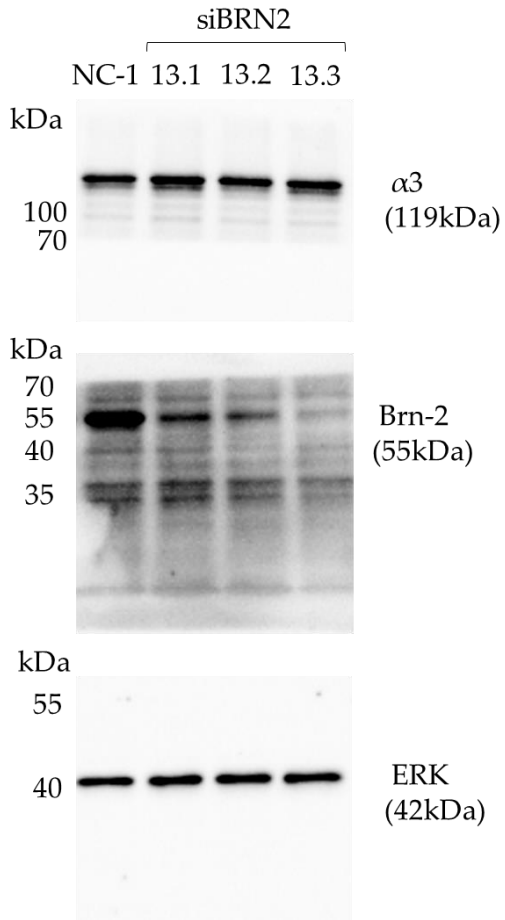

Figure 7A

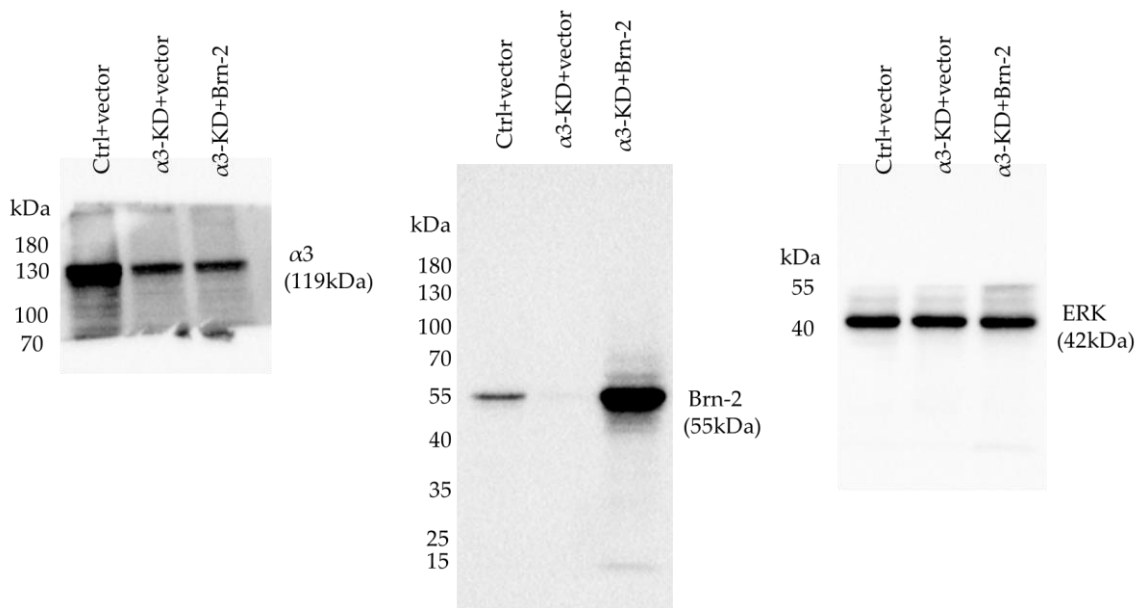

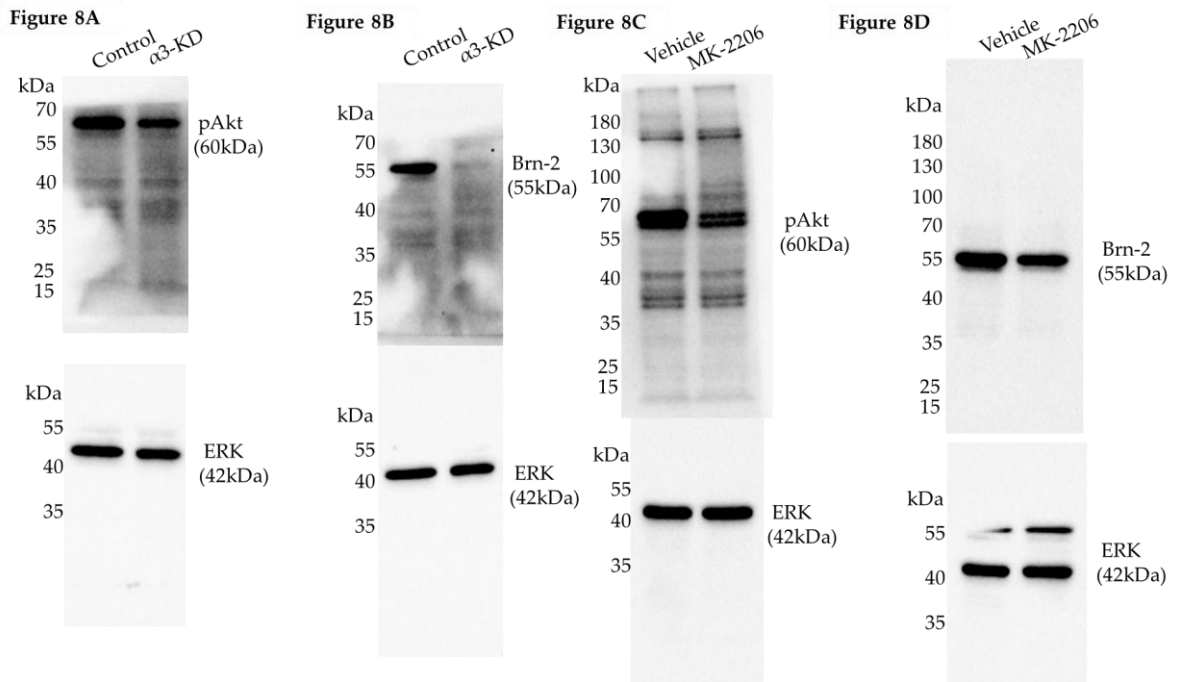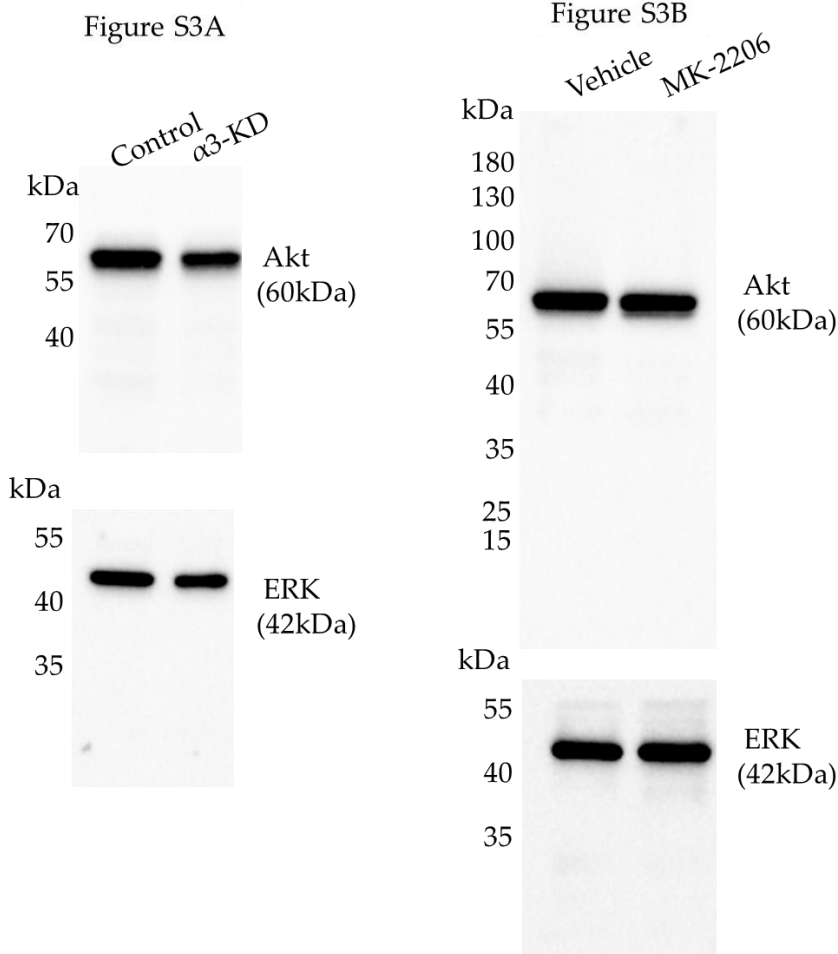

Supplement: cancers-13-00480-s001.pdf [file cancers-13-00480-s001.pdf]
